# Supplementary material for: Kinetics of the Cellular and Transcriptomic Response to Eimeria maxima in Relatively Resistant and Susceptible Chicken Lines
Source: Front Immunol. 2021 Mar 25;12:653085. doi: 10.3389/fimmu.2021.653085 (PMC8027475; doi:10.3389/fimmu.2021.653085)
Supplement: Supplementary file 5 [file Table_3.xlsx]

## Sheet: Sheet1
Cluster 1	Cluster 2	Cluster 3	Cluster 4	Cluster 5	Cluster 6	Cluster 7	Cluster 8	Cluster 9	Cluster 10	Cluster 11	Cluster 12
17.5	SEPT7	MARCH5	ABCB5	SEPT8	ABCA7	ADAR	ANKFN1	ASL1	ACBD5	ACTN1	ARFGEF1
MARCH1	SEPT11	AADAC	ABCC3	ABLIM2	BIN2H2	APAF1	ARL5B	ASL2	C26H6orf106	CLIP2	CCDC125
MARCH6	AAAS	AAMDC	ABHD12B	ACTR3	CD69H1	CALCOCO2	CA2	B3GALT5	CASP18	GFPT2	CYYR1
SEPT12	AATF	ABCD4	ABL2	ADAMTSL2	CD69H10	CAMKK2	DIO2	CISH	CDHR5	HAS2	ENPP6
AARSD1	ABCF2	ACAD9	ACKR4	ADM	CD69H12	CARS	EDNRB2	CPT1A	ESRRG	MDFIC	ENSGALG00000035496
ABAT	ABI2	ACOX3	ACTG1	ALS2CL	CD69H13	CMPK2	ENSGALG00000003110	EHF	EXPH5H	PDE4B	ENSGALG00000039388
ABCA5	ACAT1	ACSL3	ADAM17	ARHGEF7	CD69H14	CMTR1	ENSGALG00000029504	FANCA	FAM102A	PDGFD	FAM3D
ABCB1	ACTB	ACSS3	ADAMTS14	ARID5A	CD69H18	DDX60LH1	ENSGALG00000041079	HTR4	FAM234A	PTP4A3	FGFRL1
ABCB6	ACTL6A	ACTR10	ADAMTS8	ART1	CD69H7	DDX60LH2	ENSGALG00000044041	IL22	HEXB	RBMS1	GFRA3
ABCB9	ACTR2	ADAM10	ADGRG1	ART1H1	CD69H9	DHX58	ENSGALG00000045174	KBTBD2	IPP	RNH1	INPP4B
ABCC13	ADAP2	ADHFE1	ADORA1	B3GNT7	CHCHD6	DTX3L	ENSGALG00000045781	LONRF2	ITM2B	SLC29A1	KCNE3
ABCC2	ADCY9	AGMO	ADPGK	B3GNT9	CLC2BL1	EIF2AK2	FCER2	MAP3K8	LACTB2	SLC6A9	MPP7
ABCC6	AFAP1L2	AKR1B10L3	AJAP1	BATF3	COMT	ENSGALG00000019795	FSTL4	NEURL1	MAP7D2	ST3GAL2	NECTIN3
ABCD2	AGO3	ALAD	AKR1B10L2	BCL2L10	DDX4	ENSGALG00000046098	GALNT3	NOXO1	PALMD	TLR15	RAPGEF5
ABCF3	AGPAT5	ALOX5	ANXA5	C19orf12H1	DPH7	EPSTI1	GBP1H1	PDCD1LG2	PDCD10	TRIB2	SLC7A4
ABCG2	AHSA1	ANKRD26	ATF3	C19orf12H2	DVL3	FMR1	GBP1H2	PRKAR2A	PLS1	TUBB6	TMTC2
ABCG5	AKIRIN2	ANKRD6	B3GNT2	C1R	EEF1E1	GBP1	GBP1H3	SBNO2	PPM1A	WDR86
ABCG8	AKT1	ANO10	B4GALT1	C1S	EIF3D	HELZ2	HOXB13	SH3TC2H1	RNF128
AC002996.1H	AL132780.3H	AP5Z1	BAIAP2	C3orf52H	EIF3L	HERC5H	KCNG3	SH3TC2H2	SHROOM3H
AC090227.1H	ALG8	AQP11	C1QL1	CASP1	ENSGALG00000031101	IFI35	LCA5L	SLC6A14	TMEM125
AC108941.2H	ALMS1	ARFIP1	CAMK4	CCL1	ENSGALG00000031315	IFI6	PADIL	SMIM33.1	TMEM259
ACAA1	ALYREF	ARL6	CCND1	CCL4.1	ENSGALG00000032268	IFIH1	PRKAR2B	SOCS3
ACAD10	ANAPC1	ASPG	CD47	CD274	ENSGALG00000032990	IFIT5	RAB31	TIFA
ACAD11	ANAPC4H1	ATG4C	CD55	CD80	ENSGALG00000033453	KIAA1109H4	RALGPS2	TNFRSF6B
ACADL	ANAPC7	ATG5	CD81	CHAF1B	ENSGALG00000034416	MINDY3	TFPI	VCAM1
ACADS	ANGPT1	ATP11B	CEBPB	chCCLi9	ENSGALG00000035540	MITD1	TGM4
ACADSB	ANLNH	ATP6AP1	CELSR1	CHPT1	ENSGALG00000035662	MOV10	TNFSF15
ACE	ANO8H1	BBOF1	CEMIP	CLTRN	ENSGALG00000037026	MX1
ACE2	ANO8H2	BDH1B	CHRDL2	CMTM6	ENSGALG00000037295	NANP
ACMSD	ANP32B	BLEC3	CLDN1	CNP	ENSGALG00000037319	NBN
ACOT13	AOAH	BORCS8	CLDN2	CPEB1	ENSGALG00000043238	NMI
ACOT8	AP1M1	BRI3	CLDN34	DALRD3	ENSGALG00000043881	OASL
ACOT9	APBB1	BTN3A3L1	COL14A1	DAZAP1	ENSGALG00000044065	PARP12
ACOX1	ARF5	C15H12orf49	COLGALT2	DLL4	ENSGALG00000044090	PARP15H
ACP2	ARHGAP11A	C15orf48	CRABP2	DNAJC7	ENSGALG00000044327	PARP9
ACP6	ARHGAP19	C17orf75	CREM	DOCK9	ENSGALG00000044542	PMLL
ACSF2	ARL5A	C1H21ORF33	CRYBG2	EIF2AK1	ENSGALG00000044755	PXK
ACSL1	ASCC1	C1H21ORF59	CSF3	ENSGALG00000002102	ENSGALG00000045406	RNF213
ACTA1	ASF1A	C1orf115	CTH	ENSGALG00000002846	ENSGALG00000045515	RSAD2
ACTR10L	ASNSD1	C1orf21	DCSTAMP	ENSGALG00000011164	ENSGALG00000045876	SAMD9L
ACY1	ASPM	C1orf228	DOK4	ENSGALG00000019325	ENSGALG00000045880	SHISA5
ACY1La	ASS1	C1QTNF4	DUOX2	ENSGALG00000024482	ENSGALG00000046019	SMCHD1
ACYP2	ASXL1	C5orf22	DUOXA1L	ENSGALG00000028821	ENSGALG00000046214	SNX10
ADAM21H	ATAD2	CADPS2	DUSP6	ENSGALG00000033676	ENSGALG00000046430	TLR3
ADCK1	ATAD3A	CALM1	DYRK3	ENSGALG00000034774	ENSGALG00000046504	TRANK1
ADGRG4H	ATAD5	CAMK1D	ECM1H	ENSGALG00000037559	ENSGALG00000046678	TRIM25
ADH1C	ATR	CBR1	EDNRB	ENSGALG00000040162	EXOSC2	USP18
ADH6	AURKA	CCDC177	EDQM2	ENSGALG00000042587	FOXRED2	USP25
ADI1	AVD	CD69H2	ELOVL3	ENSGALG00000042905	HCK	ZC3HAV1
ADRA2A	B4GALNT4	CD69H21	ENDOD1	ENSGALG00000043925	JMJD4	ZNFX1
AGA	B4GALT7	CD69H3	ENSGALG00000030502	ENSGALG00000044062	LIMS1
AGMAT	BAZ1B	CD8AH1	ENSGALG00000031226	ENSGALG00000046130	LIMSAL1L1
AGTRAP	BIRC5	CDC23	ENSGALG00000033509	ENSGALG00000046382	MAPRE2
AHCYL2	BLM	CDCP2	ENSGALG00000034885	ENSGALG00000046411	MHCIA5
AIFM2	BMS1	CFAP36	ENSGALG00000035716	ETV4	MR1H1
AIFM3	BORA	CFAP65	ENSGALG00000036311	ETV6	MR1H12
AIG1	BPNT1	CHDH	ENSGALG00000036533	ETV7	MR1H3
AIMP2	BRCA1	CHST3	ENSGALG00000036692	FAM208BH	MR1H8
AK3	BRCA2	CHUK	ENSGALG00000037166	FOXK2	NLE1
AKAP7H	BRIP1	CLIC6	ENSGALG00000038396	GBE	NMNAT1
AKR1A1	BRMS1L	CLTCL1	ENSGALG00000038584	GDA	NTSR1
AKR1E2	BTF3L4	COMMD6	ENSGALG00000039585	GFER	NUDT3
AKR7A2	BUB1	CRCP	ENSGALG00000040904	GIMAP5	PEA15L1/2
AKTIP	BUB1B	CRIM1	ENSGALG00000042245	GIMAP7L5	PIK3CG
AL359736.1H	BUB3	CRIPT	ENSGALG00000042292	GIMAP8H	PSAP
ALAS1	BYSL	CTBS	ENSGALG00000043065	GMFB	RANBP2H
ALDH1A1	BZW1	CTPS2	ENSGALG00000043381	GVINP1	SHANK2
ALDH9A1	C1D	CWH43	ENSGALG00000043880	HK2	SPATA5H1
ALDRL	C1orf198	CXorf56	ENSGALG00000044714	HMBOX1	TDRKH
ALPP	C1QA	CYP2C23b	ENSGALG00000045510	HS6ST1	TRMT11
AMDHD2	C1QB	CYP2D6	ENSGALG00000045548	HSPA12B	TUBGCP4
AMFR	C1QBP	DECR1	ENSGALG00000045917	IFNAR1	Y-LEC1
ANAPC16	C1QC	DERA	ENSGALG00000046053	IFNAR2
ANKH	C7orf50	DNAH12	EPB41L4A	IFNG
ANKRD27	CAD	DONSON	FADS2	IL10
ANKS4B	CAP1	DOPEY2	FAH	IL12A
ANKZF1	CAPZA1	ELP6	FAM3C	IL17RA
ANO5	CAPZA2	ENPP3	FARP1	IL4I1
ANPEP	CAPZB	ENPP4	FHL3	IRF1
ANXA13	CASP2	ENSGALG00000007016	FSCN1	IRF7
ANXA4	CBX1	ENSGALG00000008404	FSTL1	IRF8
AOC1H	CBX3	ENSGALG00000009272	FTL	IRF9
AOC3b	CBX5	ENSGALG00000013101	GABRA5	KAZN
AP000311.1H	CCDC12	ENSGALG00000013268	GJB3	KCTD20
AP1S1	CCDC77	ENSGALG00000019932	GJD3	LPAR6
APLP2	CCL26	ENSGALG00000027597	GNAZ	LRRC75A
APMAP	CCNA2	ENSGALG00000029249	GNG12	LY6E
APPL1	CCNB2	ENSGALG00000029522	GNOT2	MADPRT1
ARFIP2	CCNB3	ENSGALG00000029546	GPC1	MASP1
ARHGAP42	CCNE2	ENSGALG00000030047	GRP	MAT2B
ARHGEF26	CCNF	ENSGALG00000030583	HGF	MIER1
ARHGEF37	CCR2	ENSGALG00000030930	HHIPL1	MNAT1
ARL9	CCR9	ENSGALG00000030967	HIF3A	MRGPRH
AS3MT	CCT2	ENSGALG00000032089	HSD17B12	MTHFD2
ASAH1	CCT4	ENSGALG00000032665	HSPA12A	NAMPT
ASAH2BH	CCT5	ENSGALG00000032874	IL1B	NLRC5
ASAP3	CCT6A	ENSGALG00000033856	IL1R2	NTNG2
ASRGL1	CCT7	ENSGALG00000034611	IL1RAP	OGFR
ATG9B	CCT8	ENSGALG00000034631	IL1RL1	OTUD4
ATL2	CD5LH1	ENSGALG00000034719	INF2	P2RX7
ATOH7	CDC16	ENSGALG00000035292	INHBA	PATL2
ATP1A1	CDC20	ENSGALG00000035512	IRX1	PCGF5
ATP6AP2	CDC25A	ENSGALG00000035706	ITGA2	PDX1
ATP6V0A1	CDC27	ENSGALG00000037156	ITGB1	PFKP
ATP6V0E2	CDC45	ENSGALG00000037298	ITGB6	PGS1
ATP6V1D	CDC6	ENSGALG00000037565	ITPKB	PHYHD1
ATP7B	CDC7	ENSGALG00000037674	KCNJ5	PLA2G6
AVL9	CDCA3	ENSGALG00000038691	KDELC1	PLAC8H
AZIN1	CDCA7	ENSGALG00000038845	KRT12	PMAIP1
BAAT	CDCA7L	ENSGALG00000038876	KRT15	PMLH
BAG4	CDK1	ENSGALG00000039113	KRT23	POLDIP3
BAIAP2L1	CDK11A	ENSGALG00000039350	KRT75	PPP2R5A
BAIAP2L2	CDK2	ENSGALG00000040285	LGR6	PPP3R1
BAMBI	CDKN3	ENSGALG00000040358	LIPG	PSTPIP2
BCHE	CDT1	ENSGALG00000040837	LITAF	PTPN2
BCO1	CDV3	ENSGALG00000041588	LOXL3	PTPRE
BDH2	CENPA	ENSGALG00000041729	LPCAT2	RANGAP1
BET1	CENPC	ENSGALG00000041996	LRP8	RBM43
BMP3	CENPE	ENSGALG00000042979	LRRC8A	RNF19B
BMX	CENPF	ENSGALG00000043111	LYPD1H	RNF216
BNIP3	CENPI	ENSGALG00000044443	MAL2	RNF24
BORCS5	CENPJ	ENSGALG00000044592	MAML2	RP9
BRI3BP	CENPL	ENSGALG00000044751	MAP1BH1	RPA3
BROX	CENPM	ENSGALG00000044882	MAP1BH2	RPP40
BSDC1	CENPN	ENSGALG00000045175	MAP2K3	RRAGA
BSG	CENPO	ENSGALG00000045381	MAP3K5	SAMD9LH
BSPRY	CENPP	ENSGALG00000045408	MASP2	SAMHD1
C10orf76	CENPQ	ENSGALG00000045487	mesd	SARAF
C11H19orf12	CENPS	ENSGALG00000046321	MET	SERPING1
C11orf52	CENPT	ENSGALG00000046360	MID1	SETX
C13H5orf15	CENPU	ENSGALG00000046455	MLPH	SLBP
C15orf40	CENPW	EPHX1L	MNX1	SLC25A29
C17H9orf16	CEP112	EPHX4	MPZL3	SLC6A6
C19orf25	CEP128	ERICH1	MYBPH	SLC7A3
C19orf44H	CEP135	ESYT2	MYO10L	SOCS1
C1H11ORF54	CEP192	EXOSC9	NADK2	STARD5
C1orf43H	CEP55	EXT2	NES	STAT1
C1orf50	CEP83	F7	NIPAL4	STAT2
C1orf74	CFH	FAHD1	NOS2	STAT5B
C1QTNF8	CHEK1	FAM109A	NPTX1	STK4
C2	CHEK2	FDXR	NRG1	SUCO
C20H20ORF24	CHM	FNDC3A	OLFM1	SUDS3
C25H1ORF43	CHTF18	FOPNL	OSTM1	TAP1
C26H6orf89	CHTF8	FOXP2	OTOP1	TAP2
C2H8ORF22	CIT	GAA	P2RY10H	TAPBPL
C3H6orf120	CIZ1	GABPB1	P4HA1	TBC1D22B
C5H15orf57	CKAP2	GALNT12	PACSIN3	THEMIS2
C7orf25	CKAP4	GLB1	PAQR8	TM4SF19
CA9	CKAP5	GLT8D2	PARVB	TM9SF2
CACNA1B	CLNS1A	GPR37L1	PCYOX1L	TMEM164
CALM2	CLSPN	GSTA4L	PDGFB	TMEM173
CANX	CLSTN3	GTPBP6	PDLIM1	TMEM248
CARD10	CMKLR1	GUF1	PIEZO1	TNIP3
CASC4	CNOT9	HAGHL	PKP1	TOMM34
CASKIN2	COPS7B	HESX1	PLA2G4EH2	TOR1BL
CAT	COTL1	HIBADH	PLK2	TOX3
CBR4	CPSF2	HINT3	PODXL2	TRAFD1
CCDC28A	CPSF3	HKDC1	PPP2R2B	TRIM38H
CCDC30H	CPSF4	HLA-F10AL4	PRDM8	TSEN15
CCDC47	CPSF6	HS1BP3	PROM1	TTC3
CCDC97	CSE1L	HSD17B2	PTGER3	UBE2D2
CCNC	CSF2RA	HSPB11	PTK7	UCKL1
CCNI	CSNK1D	HUS1	RAB11B.1	VPS54
CCNYL1	CTBPL	IGSF1H3	RAB7B
CCZ1	CTPS1	IMPACT	RAP1B
CD151	CTSC	IPMK	RFLNB
CD1AH	CTSH	ITIH2	RHPN2
CD2AP	CTSS	JAG1	RND3
CD69H16	CUEDC2	KDSR	RUSC2
CD99	CYP11A1	KIAA1147	SDC1
CD99L2	CYP21A1	KIF3A	SDK2
CDA	DBF4	KLHL38	SEMA3F
CDHR2	DBF4B	KLKB1H	SEMA7A
CDHR3	DBNL	L2HGDH	SERPINB5
CDK19	DCAF13	LARS2	SERPINE2
CDKL1	DCK	LEPROT	SIX1
CDR2	DCLRE1A	LGALSL	SLAIN1
CENPVH	DCUN1D5	LGMN	SLC16A1
CEP104	DDX18	LNX1	SLC16A3
CEPT1	DDX19B	LSM6	SLC1A4
CERS2	DDX21	LTC4SL	SLC2A1
CERS5	DDX24	LYPLA1	SLC2A9
CES1H2	DDX27	LYRM2	SLC38A3
CES2	DDX47	MACROD2H	SLC39A6
CFAP45	DDX49	MALRD1	SLC6A13
CGRRF1	DEPDC1	MAN1B1	SLC7A1
CHAMP1	DEPDC1B	MANBALH17	SLC7A5
CHDSD	DGUOK	MCUB	SOWAHC
CHMP1A	DHODH	MED10	SPRED1
CHMP2B	DHX15	MFAP3	SRGAP1
CHMP3	DHX33	MFSD13AH	STC1
CHMP4C	DHX36	MHCIA1b	TAOK3
CHMP5	DHX37	MHCIA2	TFCP2L1
CHP1	DIAPH3	MHCIY	TGFB3
CHST6	DIEXF	MKNK1	TGFBI
CIB1	DIS3	MLYCD	TGFBR3
CIDEA	DKC1	MOGH1	THBS1
CITED4	DLGAP5	MOGH2	THY1
CL2	DNA2	MOGH3	TIMP2
CLC2DL3	DNAJA2	MOGH9	TMEM100
CLCN2	DNAJC9	MPPED2	TMEM136-1
CLCN3	DPF2	MPV17L2	TMEM61
CLCN5	DSCC1	MPZL1	TMPRSS4
CLDN10	DTL	MR1H	TNFRSF11B
CLDND1	DTYMK	MR1H10	TRPA1
CLEC2DH1	DUS4L	MR1H9	TUBA4B
CLIC4	DUSP4	MRPS2	TUBB2B
CLINT1	DUT	MRPS9	UCHL1
CLN8	E2F1	MTA3	UMOD
CLPTM1L	E2F7	MXI1	UNC119
CLRN3	E2F8	MYL12A	VCAN
CLTB	EBNA1BP2	NAXD	VRTN
CMAS	ECT2	NFX1	WDCP
CMC4	EDC4	NOXRED1	WLS
CNBP	EFHD2	NSMCE3	WNT5B
CNIH4	EFTUD2	NUDT5	WNT9A
CNKSR1	EIF2B2	PANTL	WWC3
CNNM1	EIF2B3	PCK1	XG
CNNM2	EIF2S2	PEA15H	ZDHHC2H1
CNPPD1	EIF3I	PEX11G	ZDHHC2H2
COL17A1	EIF3J	PFKFB1
COMMD5	EIF4A1H	PGM3
COMMD7	EIF4A3	PGPEP1L
COMTD1	ELP2	PIGR
COPS7A	EMG1	PINK1
COPS8	ENSGALG00000005291	POF1B
COQ3	ENSGALG00000006048	POLE4
COQ9	ENSGALG00000007470	POT1
COX7A2L	ENSGALG00000008567	POU2F3
CPE	ENSGALG00000010120	PPDPF
CPO	ENSGALG00000010238	PPFIBP2
CPOX	ENSGALG00000024020	PRKG2
CPPED1	ENSGALG00000026816	PRKX
CR1L	ENSGALG00000029066	PTGES3L
CREB3L3	ENSGALG00000032877	PXMP4
CREG1	ENSGALG00000033466	RAB36
CRIP1	ENSGALG00000034529	RFX4
CROT	ENSGALG00000037425	RGL1
CRYZ	ENSGALG00000038134	RHBDD1
CSADH1	ENSGALG00000038194	ROS1
CSGAH	ENSGALG00000039205	RRAGD
CSTB	ENSGALG00000041323	RSPH9
CTAGE9H	ENSGALG00000042171	RWDD3
CTDSP1	ENSGALG00000042254	SALL4
CTSO	ENSGALG00000043938	SAT1
CTSZ	ENSGALG00000044000	SCRN3
CUBN	ENSGALG00000044113	SDCBP
CUL3	ENSGALG00000044476	SEMA5A
CUL4A	ENSGALG00000044717	SERPINF2
CYB561	ENSGALG00000045320	SH3BGRL2
CYB5A	ENSGALG00000045671	SH3BP2
CYB5R2	ENSGALG00000045842	SLC23A1H
CYBRD1	ENSGALG00000045916	SLC37A4
CYP20A1	ENSGALG00000046110	SLC39A9
CYP2AC1	ENTPD1	SLC49A3
CYP2AC2	EPHB2	SMPD3
CYP2J23	EPRS	SNAI2L
CYP2U1	ERCC6L	SNX19
CYP3A4	ERH	SRI
CYP3A5	ERI2H	STBD1H
CYP46A1	ESCO2	STON2
CYP4F11	ESPL1	SULT1B1
CYP4V2	EXO1	SULT2B1L2
CYSTM1	EZH2	SYCP2
D2HGDH	FAAP24	SYTL4
DAB1	FABP7	TARSL2
DAO	FAM120A	TCAIM
DAP	FAM72BH	TDP1
DBNDD2	FAM83D	TEX33H
DCAKD	FAM98B	TMCO3
DCTN6	FANCB	TMEM130
DCXR	FANCD2	TMEM14C
DDC	FANCEH	TMEM220
DDHD2	FANCF	TMEM53
DDO	FANCI	TMOD3
DECR2	FANCL	TMPRSS15
DEF8	FARSB	TMTC4
DEGS1	FBXO39	TRAF3IP2
DEGS2	FBXO5	TRMT5
DEPDC6	FCF1	TST
DERL1	FEN1	TTC32
DERL2	FGR	TUBB1
DERL3	FOXM1	TUBGCP2
DESI1	FP565260.1H2	UBE2J1
DFNA5	FPGS	UBXN4
DGLUCY	FTSJ3	UFL1
DHCR7	FUBP1	UROS
DHRS11	G2E3	VEGFD
DHRS7	GABPB2	xcc-b100_1894L
DIO1	GAR1	ZDHHC3
DLD	GART	ZNF541
DLEC1	GAS2L3	ZNHIT6
DLG3	GCNAH
DM5L	GCNT1
DMB1	GEMIN5
DNAAF2	GEMIN6
DNAJB12	GEN1H1
DNAJB2	GEN1H2
DNAJC19	GFI1
DNAJC28	GGA2
DNAJC5G	GINS1
DNAJC8	GINS2
DNM1	GLE1
DOLPP1	GLRX3
DPAGT1	GMNN
DPCD	GMPS
DPEP1	GNB5
DPM2	GNL2
DPP4	GNL3
DPT	GOT2
DPYD	GPSM2
DQX1	GRAMD1B
DSG2	GRSF1H1
DYNLL2H	GSPT1
DYNLT3	GTF2F2
DZANK1	GTF3C5
ECH1	GTSE1
ECHDC1	GXYLT1
ECI1	GZMA
ECI2	H2AFZ
EDF1	HARS
EFCAB1	HASPIN
EFHC2	HAT1
EGLN1	HAUS3H
EGLN3	HAUS8
EHHADH	HDAC1
EIF2A	HDGF
ELOVL6	HEATR1
EMC3	HELLS
ENDOUL	HIC1
ENPEP	HIST1H103
ENPP7	HJURP
ENSA	HMGA1
ENSGALG00000001536	HMGB1
ENSGALG00000001824	HMGB2
ENSGALG00000002666	HMGB3
ENSGALG00000003696	HMGN4
ENSGALG00000004627	HMGN5
ENSGALG00000008040	HMMR
ENSGALG00000010302	HNRNPA0
ENSGALG00000011278	HNRNPA2B1
ENSGALG00000012416	HNRNPA3
ENSGALG00000012958	HNRNPAB
ENSGALG00000013591	HNRNPH2
ENSGALG00000026762	HNRNPLL
ENSGALG00000027159	HNRNPU
ENSGALG00000029395	HNRNPUL1H1
ENSGALG00000029646	HNRNPUL1H2
ENSGALG00000030235	HPF1
ENSGALG00000030272	HSP90AB1
ENSGALG00000030334	HSPA4
ENSGALG00000030549	HSPD1
ENSGALG00000030752	HTR7
ENSGALG00000030849	HYLS1
ENSGALG00000030876	IARS
ENSGALG00000031228	IFITM3
ENSGALG00000031279	IFT52
ENSGALG00000031405	IGF2BP3
ENSGALG00000031900	IL2RB
ENSGALG00000032133	IL6R
ENSGALG00000032589	ILF2
ENSGALG00000032668	ILF3
ENSGALG00000032674	ILKAP
ENSGALG00000033201	IMPDH2
ENSGALG00000033364	INCENP
ENSGALG00000033452	INTS13
ENSGALG00000033547	INTS7
ENSGALG00000033633	IPO9
ENSGALG00000033891	IQGAP3H1
ENSGALG00000034282	ITGA8
ENSGALG00000034408	ITGADH
ENSGALG00000034598	ITPA
ENSGALG00000034784	IWS1
ENSGALG00000034920	JPH1
ENSGALG00000034937	JPT2
ENSGALG00000034990	KANSL3H1
ENSGALG00000035112	KAT2A
ENSGALG00000035229	KCNA3
ENSGALG00000035600	KDM1A
ENSGALG00000035757	KHDRBS1
ENSGALG00000036145	KHSRPH
ENSGALG00000036357	KIAA1524
ENSGALG00000036458	KIF11
ENSGALG00000036759	KIF14
ENSGALG00000036871	KIF15
ENSGALG00000037670	KIF18A
ENSGALG00000037696	KIF18B
ENSGALG00000037754	KIF20A
ENSGALG00000037786	KIF20BH1
ENSGALG00000037950	KIF20BH3
ENSGALG00000037980	KIF23
ENSGALG00000038170	KIF4A
ENSGALG00000038375	KLHL18
ENSGALG00000038642	KMT5A
ENSGALG00000038721	KNL1H
ENSGALG00000039041	KNSTRN
ENSGALG00000039122	KNTC1
ENSGALG00000039176	KPNA2
ENSGALG00000039191	KPNA4
ENSGALG00000039785	KPNB1
ENSGALG00000039958	L3MBTL3
ENSGALG00000040560	LARP7
ENSGALG00000040723	LAS1L
ENSGALG00000041070	LBR
ENSGALG00000042034	LDHB
ENSGALG00000042060	LDHBL
ENSGALG00000042099	LIN9
ENSGALG00000042190	LMF1
ENSGALG00000042468	LMNB1
ENSGALG00000042620	LMNB2
ENSGALG00000042708	LNPK
ENSGALG00000042711	LRRC52
ENSGALG00000042797	LSG1
ENSGALG00000043161	LSM3
ENSGALG00000043453	LSM4
ENSGALG00000043562	LSM7
ENSGALG00000043659	LUC7L2
ENSGALG00000043671	LYAR
ENSGALG00000043735	MAD2L1
ENSGALG00000043743	MAD2L1BP
ENSGALG00000043850	MAEA
ENSGALG00000044012	MAGOH
ENSGALG00000044074	MAK16
ENSGALG00000044100	MAPK11
ENSGALG00000044181	MASTL
ENSGALG00000044410	MATR3
ENSGALG00000044434	MAX
ENSGALG00000044585	MBNL1
ENSGALG00000044651	MBNL3
ENSGALG00000044817	MCM10
ENSGALG00000044925	MCM2
ENSGALG00000044974	MCM3
ENSGALG00000045068	MCM4
ENSGALG00000045075	MCM5
ENSGALG00000045182	MCM6
ENSGALG00000045366	MCM9
ENSGALG00000045383	MCPH1
ENSGALG00000045448	MCTP1
ENSGALG00000045677	MCTS1
ENSGALG00000045737	MECR
ENSGALG00000045738	MED24
ENSGALG00000045761	MERTK
ENSGALG00000045878	METTL13
ENSGALG00000045907	METTL6
ENSGALG00000045941	MGME1
ENSGALG00000046095	MIB1
ENSGALG00000046133	MILR1
ENSGALG00000046145	MIS12
ENSGALG00000046165	MIS18A
ENSGALG00000046197	MKI67H
ENSGALG00000046276	MMD
ENSGALG00000046460	MMS22L
ENSGALG00000046492	MPHOSPH10
ENSGALG00000046620	MRE11
ENTPD4	MRNIP
ENTPD5	MRPL22
EPHX1	MRPS5
EPHX2	MRPS7
EPN2	MSH2
ERAL1	MSH6
ERGIC3	MSTO1
ERLIN2	MTA1
ESD	MTA2
ESPN	MTBP
ETFRF1	MTF2
ETNK1	MTFR2
ETNPPL	MTHFD1
EVPL	MTHFD1L
EZR	MTMR1
F2	MTPAP
FA2H	MTRR
FAAH2	MUC5BH1
FABP2	MYB
FAHD2AH	MYBBP1A
FAM102B	MYBL2
FAM114A2	MYEF2
FAM129B	MZT1
FAM135A	NAA15
FAM13A	NAA50
FAM160A2	NASPH
FAM173A	NAT10
FAM177A1	NCAPD2
FAM185A	NCAPD3H1
FAM18B1	NCAPD3H2
FAM204A	NCAPG
FAM210B	NCAPG2
FAM35A	NCAPH
FAM83B	NCAPH2H1
FAM89A	NCAPH2H2
FAM8A1	NCDN
FAM91A1	NCL
FBF1	NDC1
FBP1	NDC80
FBXL21	NDE1
FBXL3	NEDD1
FBXO3	NEIL3
FBXO30	NEK2
FBXO8	NEMP2
FBXW4	NFIL3H
FBXW5	NINJ1
FBXW8	NIP7
FER1L6	NLE1H
FETUB	NLK
FGD4	NMRK2
FGF1	NMT1
FGFR1OP2	NOC2L
FGFR4	NOD1
FLRT3	NOL10
FLVCR1	NOL8
FLVCR2	NOL9
FMO4	NOLC1
FN3KRP	NONO
FNTB	NOP2
FOXRED1	NOP56
FPGT	NOP58
FRMD4B	NPM3
FRRS1	NSD2
FTCD	NSL1
FUCA1	NSUN2
FYB2H	NT5C2
FYTTD1L	NUBP2
FZD5	NUCKS1
G6PC	NUDC
GAB1	NUDT1
GABARAPL2	NUDT21
GALNT1	NUF2
GANC	NUP107
GATA5	NUP133
GBE1	NUP160
GCOM1	NUP205
GCSH	NUP35
GDF9	NUP37
GDPD1	NUP43
GDPD2	NUP54
GDPD4	NUP58
GGA1	NUP62
gga-mir-6609	NUP85
GK	NUP88
GK5	NUP93
GLB1L2	NUPL2
GLUD1	NUSAP1
GMPR	ODF2
GNB1L	OIP5
GNMT	ORC1
GNPDA1	ORC2
GPAM	ORC4
GPAT3	ORC5
GPATCH2	ORC6
GPBP1L1	PA2G4
GPN2	PAICS
GPR156	PAK3
GPR160	PARP1
GPR180	PARPBP
GPR89B	PAXIP1
GPRC5DH	PBK
GPS1	PCNA
GRAMD1C	PDE12
GRAMD2A	PDHX
GRID2IPH	PFASH
GRPEL1	PHF6
GSR	PIF1
GSS	PKN3
GSTK1	PLA2G4A
GSTM2	PLBD1
GSTM2H	PLK1
GSTO1	PLK4
GSTZ1	PNN
GTF2H5	PNRC2
GTF2IRD1	POC1A
GTF3C6	POLA1
GUCA2A	POLA2H
GUCY2C	POLD3
GYS2	POLE3
H2AFY	POLEH1
H6PD	POLEH2
HAAO	POLR1B
HABP2	POLR3B
HACD3	POLRMT
HACL1	POM121CL
HADH	PPID
HAGH	PPIG
HDAC10	PPM1G
HDAC11	PPP1R8
HDDC2	PPP2R5C
HDHD5	PRC1
HDLBP	PRIM2
HEBP1	PRIMPOL
HEBP1H	PROS1
HERPUD2	PRPF19
HEXA	PRPF3
HGSNAT	PRPF4
HIBCH	PRPS1
HID1	PSIP1
HMBS	PSME3
HMCN1	PSPC1
HMGCL	PTGES3
HNF4A	PTMA
HPGD	PTTG1
HPGDS	PUF60
HPS6	PUS1
HS3ST4	PYGO1
HSD11B1b	QTRT2
HSD17B11	R3HCC1
HSFX3H1	RACGAP1
HYAL1	RAD18
HYI	RAD21
IAH1	RAD51
ICK	RAD52
ID3	RAD54B
IDH1	RAD54L
IFFO2	RAE1
IFNGR2	RAN
IFT88H1	RANBP1
IFT88H2	RANBP2
IGFBP2	RANBP3
IGSF5H	RARS
IHH	RBBP4
IL15	RBBP7
IL22RA1	RBL1
ILVBLH1	RBM19
ILVBLH2	RBM26
IMPA1	RBM27
ING5	RBMX
INPP5A	RBP5
INPP5B	RCC1
INPP5J	RCOR1
INTS10	REPS1
IQCH	REXO4
ITM2A	RFC3
ITPK1	RFWD3H1
IVD	RFWD3H2
IVNS1ABPH2	RHNO1
IYD	RIF1
JMJD8	RIOK1
KALRN	RNASE6
KARS	RNGTT
KCNJ16	RNPS1
KDM7A	RPA1
KIAA0100	RPA2
KIAA1161	RPF2
KIAA1191	RRM1
KIAA1211L	RRM2
KIAA1671	RRNAD1
KIFC3	RRP12
KLB	RRP15
KLF10	RRP1B
KLHDC2	RRP36
KLHDC4	RRP9
KLHL15	RSFR
KLHL2	RTKN2
KRT222	RTTN
KTN1	RUVBL1
KY	RUVBL2
KYAT3	S100A16
LAD1	SAMD13
LAMB2	SAP30
LAMB3	SARNP
LAMP2	SART3
LAMTOR5	SASS6
LANCL1	SDAD1
LCLAT1	SEC61A2
LDAH	SEH1L
LEAP2	SENP1
LGALS3	SEPHS1
LGI1	SESTD1
LIMK2	SET
LIPI	SETD6
LMBRD1	SETDB2
LONRF2H	SF3A2
LPAR2	SF3A3
LPAR5	SF3B3
LPGAT1	SF3B4
LRP12	SFR1
LRP5	SGO1
LRRC14	SGO2H1
LRRC23	SH2D1B
LRRC58	SHC4H
LRRC73	SHCBP1
LRRC8D	SHISA2
LRSAM1	SHMT1
LURAP1	SIGLEC1
LYSMD4	SIKE1
LZIC	SKA3
MAD2L2	SLC11A1
MAN1A1	SLC25A32
MAN2B2	SLC25A38
MANBALH1	SLC38A6
MANBALH10	SLX4IP
MANBALH11	SMARCA5
MANBALH15	SMARCB1
MANBALH5	SMARCE1
MANBALH8	SMC3
MAOA	SMC4
MAOB	SMG8
MAP2K1	SMN
MAP2K2	SNAI2
MAP3K15	SNRNP40
MAP3K6H	SNRPA1
MAPK6	SNRPD1
MAPKAPK3	SNRPE
MARVELD3	SNRPF
MBNL2	SNRPL
MCM8	SNU13
MCRIP1	SPC25
MCT2L	SPDL1
MCU	SPECC1
MCUR1	SRGAP2
MDH1	SRM
ME2H	SRP72
MELTF	SRPK1
MELTFH	SRPRB
MEP1A	SRRM1
MEP1B	SRSF1
MEST	SRSF10
METTL22	SRSF2
MFGE8	SRSF3
MFSD11	SRSF5A
MFSD4B	SRSF6
MFSD9	SRSF7L
MGAM	SSB
MGAT4B	SSRP1
MGAT4D	ST13
MGAT5	STAP1
MGST2	STARD8
MICU1	STIL
MIEF2	STK35H
MIEN1	STMN1
MIGA2	STN1
MINDY1	SUMO2
MKS1	SURF6
MLST8	SUV39H1
MME	SUZ12
MOGAT2	SYNCRIP
MOGH10	TACC3
MOGH4	TADA2A
MOGH5	TAF15
MON1A	TAF5
MPP1	TALDO1
MR1H2	TBC1D16
MR1H4	TBL3
MR1H5	TBP
MR1H6	TCEB3
MRPL2	TCERG1
MRPL32	TCF12
MRPL34	TCOF1
MRPL38	TCP1
MRPS17	TDG
MRPS25	TERF1
MRVLDC3	TERF2
MSRA	TEX10
MTERF2	TFAM
MTERF3	TFCP2
MTHFSD	TFDP1
MTIF3	TFDP2
MTMR6	THAP5
MTUS1	THOC5
MYLKSML	THOP1
MYO19H	THYN1
MYOM1	TICRR
MYOM2	TIMELESSH1
MYOM3	TIMELESSH2
N4BP2L1	TIMM22
NAPA	TKT
NAPRT	TMEM26
NARS2	TMEM268
NAT8B	TMPO
NBAS	TMSB15B
NBR1	TMX3
NCOA4	TMX4
NCSTN	TNPO2
NDFIP1	TNPO3
NDST2	TOP2A
NDUFA10	TOP3A
NDUFA6	TOPBP1
NDUFB10	TPX2
NDUFB3	TRA2B
NEDD9	TRABD
NEK3	TRAIP
NEPRO	TRAM1
NF2	TRAP1
NFKBIE	TRIM59
NGEF	TRIP13
NHSL1	TRMT61A
NINLH	TRNT1
NIPA2	TRPC2L
NIPSNAP1	TTC27
NIT2	TTF2
NMD3	TTK
NPEPL1	TUBA1A
NPTN	TUBA3E
NQO1	TUBA4A
NR1D2	TUBB
NR1I3	TUBB3
NR2C2AP	TUBG1
NR2F6	TUBGCP3
NR3C2	TWF2
NRAP	TWNK
NRBF2	TYMS
NRG4	U2AF1
NSG1	UBA2
NUDT15	UBA5
NUDT19	UBASH3B
NUDT7	UBE2C
NUDT8H	UBE2N
NUDT9	UBE2O
OARD1	UBE2S
OCIAD1	UBE2T
OCRL	UBQLN4
OGFOD3	UHRF1
OMA1	UNG
ORAOV1	UQCC1
ORMDL3	URI1
OSBPL10H	UTP14CH
OSBPL1A	UTP3H
OSBPL2	UTP4
OTUD3	UTP6
OTUD5	VPS35L
OXNAD1	WBP11
P2RX4	WDHD1
P2RY4	WDR18
PAFAH2	WDR3
PAQR3	WDR34
PARP16	WDR4
PBLD	WDR5
PC	WDR54
PCBD2	WDR77
PCYOX1	WEE1
PCYT1A	WRAP73
PCYT2	XPO4
PDE4DIPH	ZC3H14
PDE5A	ZGRF1H
PDGFA	ZNF281
PDK1	ZNF512
PDK2H1	ZNF704
PDK2H2	ZNF800
PDZD3	ZRANB3
PDZK1	ZW10
PEMT	ZWILCH
PEPD
PERP2
PEX11A
PEX14
PEX16
PEX3
PEX5
PFKFB2
PFKL
PGAP3
PGLYRP2
PGPEP1
PGRMC1
PHC1
PHLPP2
PHOSPHO1
PHYH
PHYKPL
PIGK
PIGN
PIGQ
PIK3C2G
PIN1
PIN4
PIPOX
PITPNC1L
PKP2
PLA2G12B
PLAC9
PLBD2
PLCD1
PLEKHA3
PLEKHS1
PLIN4
PLPP6
PLSCR1
PM20D1
PM20D2
PMM1
PMP22
PNPLA7
POLE2
POMK
PON2
PPA2
PPIP5K1
PPM1L
PPM1M
PPP1R17
PPP1R3E
PRAP1
PRDM4
PRDX3
PRKAB2
PRKACA
PRKAG2
PRKCA
PRKCZ
PRKN
PSMD9
PSMF1
PSMG2
PTGDS
PTGR1
PTPRN
PUS7L
PWP1
PXDC1
PXYLP1
QDPR
RAB11A
RAB11FIP2
RAB19
RAB2A
RAB43
RAB8A
RAC3
RAF1
RALY
RAP1GAP2
RAPGEFL1
RAVER2
RBKS
RBM41
RD3
REEP5
REEP6H
RER1
REXO2
RFNG
RFPL4AH2
RGCC
RGN
RGS11
RGS9BP
RHEB
RHOD
RHPN1
RIC8B
RIDA
RIMBP2
RMDN1
RNASEL
RNF10
RNF103
RNF13
RNF139
RNF14
RNF141
RNF185
RNF34
RPL35A
RPS27L
RPS6KA1L
RPS6KL1H
RPUSD2
RRBP1
RRM2B
RRN3
RSL1D1
RTCAH1
RTCAH3
RTCB
RTN4
RUFY2H1
RUFY2H2
RWDD1
RWDD4
S100B
SAR1B
SATB2
SCAMP5
SCARB1
SCFD2H1
SCFD2H2
SCP2
SCTR
SDHAF4
SDR16C5
SDR9C7H
SDSL
SEC14L2H
SEC62
SELENOI
SELENOO
SELENOP1
SERAC1
SERHL2
SERINC3
SERPINB6L
SESN2
SETD4
SFT2D2
SFXN2
SFXN4
SGK3
SGMS1
SGPP2
SGTA
SH2D4A
SHROOM1
SIDT2H1
SIGIRR
SIRT3
SKP1
SLC11A2
SLC13A1
SLC15A1
SLC16A4
SLC16A5
SLC16A6
SLC16A9
SLC18B1
SLC19A1
SLC1A1
SLC1A7
SLC20A1
SLC22A13
SLC22A13H
SLC22A13La
SLC22A18
SLC23A1
SLC25A16
SLC25A20
SLC25A24
SLC25A34
SLC25A43
SLC25A48
SLC25A6
SLC27A4
SLC27A5
SLC28A2
SLC2A2
SLC2A5
SLC30A1
SLC30A4
SLC31A1
SLC35A1
SLC35B1
SLC35D1
SLC35F2
SLC37A3
SLC38A10
SLC39A11
SLC3A1
SLC3A2H
SLC44A3
SLC46A1
SLC46A3
SLC47A1
SLC4A2
SLC4A4
SLC51A
SLC52A3
SLC5A11
SLC5A6
SLC6A19
SLC6A4
SLC6A7H
SLC7A6
SLC7A9
SLC7A9H
SLC8B1
SLC9A3R1
SLITRK3
SMAD1
SMDT1
SMIM12
SMPDL3B
SMUG1
SNAP23
SNAP29
SNTB1
SNX12
SNX14
SNX17
SNX33
SNX4
SNX6
SNX7
SOAT1
SOD1
SOD2
SORD
SOS2
SPG7
SPINK9H1
SPINK9H2
SPIRE2
SPPL2A
SPPL2B
SPPL3
SQSTM1
SRD5A3
ST3GAL2L
ST3GAL5
ST6GALNAC3
STAMBP
STAU2
STC2
STK25
STK3
STK40
STOM
STS
STX18
STX2
STX7
STYK1
SUCLG1
SULT1B
SULT1C3
SUSD2
SYAP1
SYDE2
SYTL1
TAPT1
TBC1D10A
TBC1D24
TBL2
TBX19
TBX3
TCF25
TDP2
TEF
TENM3
TERT
TESK2
TEX2
TEX45
THAP4
THEM4H
THNSL2
THRA
THUMPD3H1
TIMM21
TINAG
TJP3
TM2D1
TM2D3
TM6SF2
TM9SF2L
TMBIM6
TMC2
TMC7
TMCC1
TMEM128
TMEM129
TMEM144
TMEM14A
TMEM170A
TMEM171
TMEM183A
TMEM184B
TMEM19
TMEM213
TMEM241
TMEM269
TMEM30A
TMEM35B
TMEM37
TMEM38A
TMEM41A
TMEM45B
TMEM5
TMEM50A
TMEM57
TMEM59
TMEM63B
TMEM86A
TMEM9
TMEM9B
TMIGD1
TMTC3H1
TMTC3H2
TOM1L1
TP53TG5
TPCN2
TPRA1
TPRG1L
TRAK2
TRH
TRIAP1
TRUB1
TSC2
TSC22D3
TSG101
TSPAN13
TSPAN15
TSPAN3
TTC17H1
TTC38
TUBGCP6
TWF1
TXN2
TXNDC17
TXNL4B
TYRO3
TYW3
UBAC2
UBALD1
UBE2B
UBE2Q2
UBE3B
UBIAD1
UCHL3
UCK1
UEVLD
UGDH
UGP2
UGT2A1
UHMK1
ULK2
UMPS
UPP1
URAH
USH1C
USP2
USP36
UTS2RL
VAPB
VAT1
VDAC1
VDR
VEPH1
VIPR1
VMA21
VSIG10
VTA1
VTG2
VTN
VWA8
WBP1L
WBP2
WBP2NL
WDTC1
WIPI2
WRN
WSB2
WSCD1
WWC1
WWC2
WWOX
WWP1
XKRX
XPNPEP2
XYLB
YIPF3
YIPF4
YME1L1
YPEL5
ZADH2
ZDHHC23
ZDHHC6
ZDHHC7
ZDHHC9
ZFYVE1
ZFYVE21
ZFYVE9
ZMYND12
ZNF319
ZNF706
ZNF777H
ZRANB1
